# Supplementary material for: Increased cortisol levels caused by acute resistance physical exercise impair memory and learning ability
Source: PeerJ. 2022 Mar 23;10:e13000. doi: 10.7717/peerj.13000 (PMC8957269; doi:10.7717/peerj.13000)
Supplement: Supplemental Information 1 [file peerj-10-13000-s001.xlsx]

## Sheet: DATA
Participant	W	O	Hand	C1BASAL	C2TRASVIG	C3BASALSES2	C4TRASVIGREPSES2	C5TRASFUERSES2	C6TRASVIGFUERSES2	INCREMCORESFV25V23	S1ENSAYOSUTILIZADOS	S1TOTALCORRECTOS	S1TOTALERRORES	S1ACIERTOSHASTAAPRENDIZAJE	S1ACIERTOSENSAYOS	S1ACIERTOSERRORESENSAYOS	S2ENSAYOSUTILIZADOS	S2TOTALCORRECTOS	S2TOTALERRORES	S2ACIERTOSHASTAAPRENDIZAJE	S2ACIERTOSENSAYOS	S2ACIERTOSERRORESENSAYOS	S3ENSAYOSUTILIZADOS	TOTALCORRECTOS	TOTALERRORES	S3ACIERTOSHASTAAPRENDIZAJE	S3ACIERTOSENSAYOS	S3ACIERTOSERRORESENSAYOS	S1RulitMemoriaCorrectos	S1RulitMemoriaErrores	S1RulitMemoriaCorrectosErrores	S2RulitMemoriaCorrectos	S2RulitMemoriaErrores	S2RulitMemoriaCorrectosErrores	S3RulitMemoriaCorrectos	S3RulitMemoriaErrores	S3RulitMemoriaCorrectosErrores	Dia1Staie	Dia2Staie	Log_C5TRASFUERSES2	Log_C3	Log_C4	Log_C6	Log_c1	Log_c2	S1_2_4	S1_5_7	S1_8_10	S2_2_4
1	88.3	30	derecha	4.23	6.304	4.092	5.495	5.387	4.228	1.295	8	110	19	96	12	9.63	5	123	3	67	13.4	12.8	4	123	3	53	13.25	12.5	13	1	12	14	0	14	14	0	14	19	14	1.68399	1.40903	1.70384	1.44173	1.4422	1.84118	10.6667	11.6667	14	13
4	85.1	29	derecha	10.661	8.755	3.596	2.994	3.539	2.566	-0.057	4	120	8	50	12.5	10.5	7	120	8	92	13.14	12	6	120	8	78	13	11.67	13	1	12	13	1	12	14	0	14	15	12	1.26384	1.27982	1.09661	0.942348	2.36659	2.16962	12	14	14	12.6667
5	71.8	35	derecha	9.57	6.35	3.739	4.081	2.305	1.596	-1.434	6	118	8	76	12.67	11.33	4	122	5	52	13	11.75	4	121	8	51	12.75	10.75	14	0	14	14	0	14	14	0	14	11	2	0.835081	1.31882	1.40634	0.4675	2.25863	1.84845	12	13.3333	14	12.6667
6	75.5	36	derecha	5.973	13.366	5.287	4.797	3.625	3.042	-1.662	9	98	34	98	10.89	7.11	9	112	16	112	12.44	10.67	7	115	11	87	12.43	10.86	13	1	12	14	0	14	12	2	10	4	4	1.28785	1.66525	1.56799	1.11252	1.78725	2.59271	10.6667	11	11	12.6667
7	72.2	35	derecha	7.249	4.95	3.415	2.43	1.651	1.972	-1.764	5	121	5	67	13.4	12.4	7	121	5	92	13.14	12.43	5	120	6	64	12.8	11.6	14	0	14	14	0	14	14	0	14	7	9	0.501381	1.22818	0.887891	0.679048	1.98086	1.59939	12.3333	14	14	13
8	79	37	derecha	5.905	5.861	3.681	4.696	3.715	2.608	0.034	4	122	5	52	13	11.75	5	124	2	68	13.6	13.2	5	121	6	79	13.17	12.17	13	1	12	14	0	14	14	0	14	7	6	1.31238	1.30318	1.54671	0.958584	1.7758	1.76832	12.6667	14	14	13.3333
9	76.1	39	Izquierda	4.129	3.12	2.585	1.773	4.039	3.685	1.454	7	121	9	93	13.29	12	7	120	8	92	13.14	12	3	123	5	39	13	11.33	13	1	12	13	1	12	11	3	8	4	4	1.396	0.949726	0.572673	1.30427	1.41804	1.13783	12.3333	13.6667	14	12.3333
10	68.3	37	derecha	2.691	2.716	1.337	0.972	2.064	1.837	0.727	3	125	1	41	13.67	13.33	2	126	0	28	14	14	3	125	1	41	13.67	13.33	14	0	14	14	0	14	14	0	14	16	4	0.724646	0.290428	-0.0283995	0.608134	0.989913	0.99916	13.6667	14	14	14
11	97.3	30	derecha	2.771	1.709	3.804	1.684	1.781	1.455	-2.023	4	123	3	53	13.25	12.5	4	123	3	53	13.25	12.5	3	124	2	40	13.33	12.67	13	1	12	14	0	14	13	1	12	12	8	0.577175	1.33605	0.521172	0.375006	1.01921	0.535908	13	14	14	13
12	76.7	32	derecha	4.591	2.963	5.693	2.977	3.804	3.246	-1.889	4	124	2	54	13.5	13	4	123	3	53	13.25	12.5	6	120	8	79	13.17	11.83	14	0	14	14	0	14	14	0	14	16	12	1.33605	1.73924	1.09092	1.17742	1.5241	1.0862	13.3333	14	14	13
13	87.2	26	derecha	3.009	1.594	2.952	0.853	1.135	1.493	-1.817	5	120	6	64	12.8	11.6	5	121	5	65	13	12	4	120	6	50	12.5	11	14	0	14	14	0	14	14	0	14	13	9	0.126633	1.08248	-0.158996	0.400788	1.10161	0.466247	12	14	14	12.3333
14	77.5	29	Izquierda	3.138	2.858	2.043	1.946	7.522	4.719	5.479	6	120	8	78	13	11.67	2	126	0	28	14	14	4	123	3	53	13.25	12.5	12	2	10	14	0	14	14	0	14	10	10	2.01783	0.714419	0.665776	1.5516	1.14359	1.05012	12.3333	13.6667	14	14
15	80.3	33	derecha	2.959	2.068	2.108	2.306	11.999	7.554	9.891	7	121	5	93	13.29	12.57	3	125	1	41	13.67	13.33	3	124	2	40	13.33	12.67	14	0	14	14	0	14	14	0	14	18	11	2.48482	0.74574	0.835514	2.02208	1.08485	0.726582	13	14	14	13.6667
16	77	27	derecha	4.254	3.816	3.052	3.956	4.557	3.21	1.505	4	123	3	53	13.25	12.5	4	125	1	55	13.75	13.5	5	122	6	66	13.2	12	13	2	11	14	0	14	13	2	11	6	4	1.51666	1.1158	1.37523	1.16627	1.44786	1.3392	13	14	14	13.6667
17	76.1	30	derecha	3.575	4.205	3.413	2.588	9.651	6.581	6.238	2	126	0	28	14	14	3	125	1	41	13.67	13.33	7	118	8	90	12.86	11.71	14	0	14	14	0	14	14	0	14	3	1	2.26706	1.22759	0.950885	1.88419	1.27397	1.43627	13.6667	14	14	13.6667
18	81.6	39	derecha	7.779	5.613	4.034	4.403	8.074	6.52	4.04	7	116	10	88	12.57	11.14	4	121	5	51	12.75	11.5	5	121	10	65	13	11	14	0	14	13	1	12	13	2	11	16	17	2.08865	1.39476	1.48229	1.87487	2.05143	1.72509	12	13.3333	14	12.3333
19	77	26	Izquierda	4.076	2.889	3.781	3.327	4.622	3.624	0.841	3	125	1	41	13.67	13.33	2	126	0	28	14	14	4	125	1	55	13.75	13.5	13	1	12	14	0	14	14	0	14	13	11	1.53083	1.32999	1.20207	1.28758	1.40512	1.06091	13.6667	14	14	14
20	65.3	38	derecha	10.411	6.324	3.089	4.088	4.022	4.012	0.933	9	106	27	106	11.78	8.78	6	121	8	79	13.17	11.83	8	98	21	98	12.25	9.63	12	2	10	14	0	14	13	1	12	8	6	1.39178	1.12785	1.40806	1.38929	2.34286	1.84435	11	11.3333	13	12.6667
21	72.4	33	derecha	7.791	8.977	4.327	5.752	9.624	6.782	5.297	8	115	12	101	12.63	11.13	5	122	5	66	13.2	12.2	5	118	9	62	12.4	10.6	13	1	12	14	0	14	13	1	12	2	2	2.26426	1.46487	1.74955	1.91427	2.05297	2.19467	11	13.3333	14	12.6667
						cortisol
[truncated: 10 more columns]

## Sheet: Trials
Session2
	trials	2	3	4	5	6	7	8	9	10
participants	1	13	13	13	14	14	14	14	14	14
	4	13	13	12	13	13	14	14	14	14
	5	11	13	14	14	14	14	14	14	14
	6	12	13	13	13	11	11	13	13	13
	7	12	13	14	13	13	14	14	14	14
	8	13	14	13	14	14	14	14	14	14
	9	12	13	12	14	13	14	14	14	14
	10	14	14	14	14	14	14	14	14	14
	11	12	13	14	14	14	14	14	14	14
	12	12	13	14	14	14	14	14	14	14
	13	12	12	13	14	14	14	14	14	14
	14	14	14	14	14	14	14	14	14	14
	15	13	14	14	14	14	14	14	14	14
	16	14	13	14	14	14	14	14	14	14
	17	13	14	14	14	14	14	14	14	14
	18	10	13	14	14	14	14	14	14	14
	19	14	14	14	14	14	14	14	14	14
	20	13	13	12	13	14	14	14	14	14
	21	11	14	13	14	14	14	14	14	14
session3
	trials	2	3	4	5	6	7	8	9	10
trials	1	13	12	14	14	14	14	14	14	14
	4	10	13	14	13	14	14	14	14	14
	5	11	12	14	14	14	14	14	14	14
	6	10	11	13	13	12	14	14	14	14
	7	11	12	13	14	14	14	14	14	14
	8	11	13	14	13	14	14	14	14	14
	9	11	14	14	14	14	14	14	14	14
	10	13	14	14	14	14	14	14	14	14
	11	12	14	14	14	14	14	14	14	14
	12	11	12	14	13	14	14	14	14	14
	13	10	12	14	14	14	14	14	14	14
	14	12	13	14	14	14	14	14	14	14
	15	12	14	14	14	14	14	14	14	14
	16	12	13	13	14	14	14	14	14	14
	17	11	11	13	14	13	14	14	14	14
	18	12	12	13	14	14	14	14	14	14
	19	14	13	14	14	14	14	14	14	14
	20	10	11	12	11	13	13	14	14	14
	21	11	11	12	14	14	14	14	14	14

## Sheet: Trials (2)
sesión 2
	Ensayos	2	3	4	5	6	7	8	9	10
sujetos	1	5,E,8	6,E,7	5,E,8	14	14	14	14	14	14
	4	7,E,6	2,E,11	2,E,2,E,8	7,E,6	7,E,6	14	14	14	14
	5	1,E,1,E,2,E,7	6,E,7	14	14	14	14	14	14	14
	6	1,E,5,E,6	2,E,11	2,E,11	5,E,8	3,E,1,E,2,E,6	1,E,3,E,1,E,6	1,E,12	4,E,9	1,E,12
	7	6,E,4,E,2	6,E,7	14	6,E,7	6,E,7	14	14	14	14
	8	6,E,7	14	6,E,7	14	14	14	14	14	14
	9	2,E,2,E,8	7,E,6	5,E,1,E,6	14	7,E,6	14	14	14	14
	10	14	14	14	14	14	14	14	14	14
	11	6,E,E,6	6,E,7	14	14	14	14	14	14	14
	12	4,E,E,8	1,E,12	14	14	14	14	14	14	14
	13	1,E,E,11	2,E,2,E,8	2,E,11	14	14	14	14	14	14
	14	14	14	14	14	14	14	14	14	14
	15	3,E,10	14	14	14	14	14	14	14	14
	16	14	5,E,8	14	14	14	14	14	14	14
	17	8,E,5	14	14	14	14	14	14	14	14
	18	1,E,1,E,E,2,E,6	4,E,9	14	14	14	14	14	14	14
	19	14	14	14	14	14	14	14	14	14
	20	2,E,11	2,E,11	2,E,2,E,8	2,E,11	14	14	14	14	14
	21	2,E,4,E,1,E,4	14	7,E,6	14	14	14	14	14	14
sesión 3
	Ensayos	2	3	4	5	6	7	8	9	10
sujetos	1	7,E,6	7,E,1,E,5	14	14	14	14	14	14	14
	4	1,E,1,E,2,E,4,E,2	2,E,11	14	13	14	14	14	14	14
	5	2,E,4,E,1,E,4	1,E,3,E,8	14	14	14	14	14	14	14
	6	2,E,E,4,E,2,E,2	6,E,1,E,2,E,2	8,E,5	3,E,10	6,E,1,E,5	14	14	14	14
	7	2,E,2,E,1,E,6	2,E,2,E,8	5,E,8	14	14	14	14	14	14
	8	1,E,E,4,E,6	2,E,11	14	2,E,11	14	14	14	14	14
	9	3,E,2,E,1,E,5	14	14	14	14	14	14	14	14
	10	7,E,6	14	14	14	14	14	14	14	14
	11	6,E,1,E,5	14	14	14	14	14	14	14	14
	12	1,E,3,E,E,7	5,E,E,7	14	5,E,8	14	14	14	14	14
	13	2,E,E,2,E,1,E,5	6,E,1,E,5	14	14	14	14	14	14	14
	14	1,E,6,E,5	6,E,7	14	14	14	14	14	14	14
	15	2,E,4,E,5	14	14	14	14	14	14	14	14
	16	1,E,9,E,2	6,E,7	6,E,7	14	14	14	14	14	14
	17	E,4,E1,E,6	5,E,1,E,E,5	7,E,6	14	7,E,6	14	14	14	14
	18	6,E,3,E,3	6,E,3,E,3	6,E,7	14	14	14	14	14	14
	19	14	6,E,7	14	14	14	14	14	14	14
	20	2,E,3,E,1,E,E,4	6,E,1,E,E,4	6,E,1,E,5	1,E,E,3,E,7	6,E,7	7,E,6	14	14	14
	21	3,E,2,E,1,E,5	3,E,1,E,E,7	5,E,E,7	14	14	14	14	14	14

## Sheet: 1º
Session2
	Trial	2	3	4	5	6	7	8	9	10
participant	1	5	6	5	14	14	14	14	14	14	11.1111	5.33333
	4	7	2	2	7	7	14	14	14	14	9	5
	5	1	6	14	14	14	14	14	14	14	11.6667	3.5
	6	1	2	2	5	3	1	1	4	1	2.22222	2.22222
	7	6	6	14	6	6	14	14	14	14	10.4444	7.6
	8	6	14	6	14	14	14	14	14	14	12.2222	8.66667
	9	2	7	5	14	7	14	14	14	14	10.1111	7
	10	14	14	14	14	14	14	14	14	14	14	14
	11	6	6	14	14	14	14	14	14	14	12.2222	6
	12	4	1	14	14	14	14	14	14	14	11.4444	2.5
	13	1	2	2	14	14	14	14	14	14	9.88889	1.6
	14	14	14	14	14	14	14	14	14	14	14	14
	15	3	14	14	14	14	14	14	14	14	12.7778	3
	16	14	5	14	14	14	14	14	14	14	13	7.36842
	17	8	14	14	14	14	14	14	14	14	13.3333	8
	18	1	4	14	14	14	14	14	14	14	11.4444	2.5
	19	14	14	14	14	14	14	14	14	14	14	14
	20	2	2	2	2	14	14	14	14	14	8.66667	2
	21	2	14	7	14	14	14	14	14	14	11.8889	4.2
Session3
	Trial	2	3	4	5	6	7	8	9	10
participants	1	7	7	14	14	14	14	14	14	14	12.4444	7
	4	1	2	14	13	14	14	14	14	14	11.1111	1.5
	5	2	1	14	14	14	14	14	14	14	11.2222	1.5
	6	2	6	8	3	6	14	14	14	14	9	5
	7	2	2	5	14	14	14	14	14	14	10.3333	3
	8	1	2	14	2	14	14	14	14	14	9.88889	1.5
	9	3	14	14	14	14	14	14	14	14	12.7778	3
	10	7	14	14	14	14	14	14	14	14	13.2222	7
	11	6	14	14	14	14	14	14	14	14	13.1111	6
	12	1	5	14	5	14	14	14	14	14	10.5556	6.25
	13	2	6	14	14	14	14	14	14	14	11.7778	4
	14	1	6	14	14	14	14	14	14	14	11.6667	3.5
	15	2	14	14	14	14	14	14	14	14	12.6667	2
	16	1	6	6	14	14	14	14	14	14	10.7778	4.33333
	17	4	5	7	14	7	14	14	14	14	10.3333	5.33333
	18	6	6	6	14	14	14	14	14	14	11.3333	6
	19	14	6	14	14	14	14	14	14	14	13.1111	10
	20	2	6	6	1	6	7	14	14	14	7.77778	4.66667
	21	3	3	5	14	14	14	14	14	14	10.5556	3.66667

## Sheet: 2º
PRE
	Ensayos	2	3	4	5	6	7	8	9	10
sujetos	1	8	7	8	14	14	14	14	14	14	11.8889	7.63636
	4	6	11	8	6	6	14	14	14	14	10.3333	6.98413
	5	7	7	14	14	14	14	14	14	14	12.4444	7
	6	6	11	11	8	6	6	12	9	12	9	8.29802
	7	2	7	14	7	7	14	14	14	14	10.3333	5
	8	7	14	7	14	14	14	14	14	14	12.4444	8.4
	9	8	6	6	14	6	14	14	14	14	10.6667	7.17949
	10	14	14	14	14	14	14	14	14	14	14	14
	11	6	7	14	14	14	14	14	14	14	12.3333	6.5
	12	8	12	14	14	14	14	14	14	14	13.1111	9.6
	13	11	8	11	14	14	14	14	14	14	12.6667	9.77778
	14	14	14	14	14	14	14	14	14	14	14	14
	15	10	14	14	14	14	14	14	14	14	13.5556	10
	16	14	8	14	14	14	14	14	14	14	13.3333	10.1818
	17	5	14	14	14	14	14	14	14	14	13	5
	18	6	9	14	14	14	14	14	14	14	12.5556	7.2
	19	14	14	14	14	14	14	14	14	14	14	14
	20	11	11	8	11	14	14	14	14	14	12.3333	10.0571
	21	4	14	6	14	14	14	14	14	14	12	6.14634
POST
	Ensayos	2	3	4	5	6	7	8	9	10
sujetos	1	6	5	14	14	14	14	14	14	14	12.1111	5.45455
	4	2	11	14	13	14	14	14	14	14	12.2222	5.41081
	5	4	8	14	14	14	14	14	14	14	12.2222	5.33333
	6	2	2	5	10	5	14	14	14	14	8.88889	3.33333
	7	6	8	8	14	14	14	14	14	14	11.7778	7.2
	8	6	11	14	11	14	14	14	14	14	12.4444	9.52577
	9	5	14	14	14	14	14	14	14	14	13	5
	10	6	14	14	14	14	14	14	14	14	13.1111	6
	11	5	14	14	14	14	14	14	14	14	13	5
	12	7	7	14	8	14	14	14	14	14	11.7778	8.2963
	13	5	5	14	14	14	14	14	14	14	12	5
	14	5	7	14	14	14	14	14	14	14	12.2222	5.83333
	15	5	14	14	14	14	14	14	14	14	13	5
	16	2	7	7	14	14	14	14	14	14	11.1111	3.81818
	17	6	5	6	14	6	14	14	14	14	10.3333	5.625
	18	3	3	7	14	14	14	14	14	14	10.7778	3.70588
	19	14	7	14	14	14	14	14	14	14	13.2222	9.33333
	20	4	4	5	7	7	6	14	14	14	8.33333	5.20661
	21	5	7	7	14	14	14	14	14	14	11.4444	6.17647

## Sheet: MAX
sesión 2
	Ensayos	2	3	4	5	6	7	8	9	10
sujetos	1	8	7	8	14	14	14	14	14	14
	4	7	11	8	7	7	14	14	14	14
	5	7	7	14	14	14	14	14	14	14
	6	6	11	11	8	6	6	12	9	12
	7	6	7	14	7	7	14	14	14	14
	8	7	14	7	14	14	14	14	14	14
	9	8	7	6	14	7	14	14	14	14
	10	14	14	14	14	14	14	14	14	14
	11	6	7	14	14	14	14	14	14	14
	12	8	12	14	14	14	14	14	14	14
	13	11	8	11	14	14	14	14	14	14
	14	14	14	14	14	14	14	14	14	14
	15	10	14	14	14	14	14	14	14	14
	16	14	8	14	14	14	14	14	14	14
	17	8	14	14	14	14	14	14	14	14
	18	6	9	14	14	14	14	14	14	14
	19	14	14	14	14	14	14	14	14	14
	20	11	11	8	11	14	14	14	14	14
	21	4	14	7	14	14	14	14	14	14
sesión 3
	Ensayos	2	3	4	5	6	7	8	9	10
sujetos	1	7	7	14	14	14	14	14	14	14
	4	4	11	14	13	14	14	14	14	14
	5	4	8	14	14	14	14	14	14	14
	6	4	6	8	10	6	14	14	14	14
	7	6	8	8	14	14	14	14	14	14
	8	6	11	14	11	14	14	14	14	14
	9	5	14	14	14	14	14	14	14	14
	10	7	14	14	14	14	14	14	14	14
	11	6	14	14	14	14	14	14	14	14
	12	7	7	14	8	14	14	14	14	14
	13	5	6	14	14	14	14	14	14	14
	14	6	7	14	14	14	14	14	14	14
	15	5	14	14	14	14	14	14	14	14
	16	9	7	7	14	14	14	14	14	14
	17	6	5	7	14	7	14	14	14	14
	18	6	6	7	14	14	14	14	14	14
	19	14	7	14	14	14	14	14	14	14
	20	4	6	6	7	7	7	14	14	14
	21	5	7	7	14	14	14	14	14	14

## Sheet: MEAN
PRE
	Ensayos	2	3	4	5	6	7	8	9	10	MEDIA TOTAL	MEDIA 2-4	MEDIA5-7	MEDIA 8-10
sujetos	1	6.5	6.5	6.5	14	14	14	14	14	14	6.5	6.5	14	14
	4	6.5	6.5	4	6.5	6.5	14	14	14	14	5.77778	5.37931	7.91304	14
	5	2.75	6.5	14	14	14	14	14	14	14	3.86486	5.09415	14	14
	6	4	6.5	6.5	6.5	2.5	2.75	6.5	6.5	6.5	4.64705	5.37931	3.26982	6.5
	7	4	6.5	6.5	14	6.5	14	14	14	14	6.38596	5.37931	10.1111	14
	8	6.5	14	6.5	14	14	14	14	14	14	7.91304	7.91304	14	14
	9	4	6.5	4	14	6.5	14	14	14	14	5.6875	4.58824	10.1111	14
	10	14	14	14	14	14	14	14	14	14	14	14	14	14
	11	6	6.5	14	14	14	14	14	14	14	6.24	7.65421	14	14
	12	6	6.5	14	14	14	14	14	14	14	6.24	7.65421	14	14
	13	6	4	6.5	14	14	14	14	14	14	5.25843	5.25843	14	14
	14	14	14	14	14	14	14	14	14	14	14	14	14	14
	15	6.5	14	14	14	14	14	14	14	14	6.5	10.1111	14	14
	16	14	6.5	14	14	14	14	14	14	14	8.87805	10.1111	14	14
	17	6.5	14	14	14	14	14	14	14	14	6.5	10.1111	14	14
	18	2.5	6.5	14	14	14	14	14	14	14	3.61111	4.79789	14	14
	19	14	14	14	14	14	14	14	14	14	14	14	14	14
	20	6.5	6.5	4	6.5	14	14	14	14	14	5.62162	5.37931	10.1111	14
	21	3.25	14	6.5	14	14	14	14	14	14	5.62887	5.62887	14	14
POST
	Ensayos	2	3	4	5	6	7	8	9	10	MEDIA TOTAL	MEDIA 2-4	MEDIA5-7	MEDIA 8-10
sujetos	1	6.5	4.3	14	14	14	14	14	14	14	5.17593	6.55261	14	14
	4	2	6.5	14	13	14	14	14	14	14	3.05882	4.13636	13.65	14
	5	2.75	4	14	14	14	14	14	14	14	3.25926	4.37915	14	14
	6	2.5	2.75	6.5	6.5	4	14	14	14	14	3.78407	3.26982	6.31214	14
	7	2.75	4	6.5	6.5	14	14	14	14	14	3.90888	3.90888	10.1111	14
	8	3.6	6.5	14	6.5	14	14	14	14	14	6.08922	5.96359	10.1111	14
	9	2.75	14	14	14	14	14	14	14	14	2.75	5.92308	14	14
	10	6.5	14	14	14	14	14	14	14	14	6.5	10.1111	14	14
	11	4	14	14	14	14	14	14	14	14	4	7.63636	14	14
	12	3.6	6	14	6.5	14	14	14	14	14	5.97265	5.81538	10.1111	14
	13	2.5	4	14	14	14	14	14	14	14	3.07692	4.15842	14	14
	14	4	6.5	14	14	14	14	14	14	14	4.95238	6.31214	14	14
	15	3.6	14	14	14	14	14	14	14	14	3.6	7.13208	14	14
	16	4	6.5	6.5	14	14	14	14	14	14	5.37931	5.37931	14	14
	17	3.6	3.6	6.5	14	6.5	14	14	14	14	5.34944	4.22892	10.1111	14
	18	4.3	4	6.5	14	14	14	14	14	14	4.71398	4.71398	14	14
	19	14	6.5	14	14	14	14	14	14	14	8.87805	10.1111	14	14
	20	2.5	3.6	4	3.6	6.5	6.5	14	14	14	3.96498	3.23353	5.12409	14
	21	3.6	3.6	6	14	14	14	14	14	14	4.15385	4.15385	14	14
		/WSFACTOR=Sesion 2 Polynomial Bloque 4 Polynomial
											/WSFACTOR=Sesion 2 Polynomial Bloque 4 Polynomial
											/METHOD=SSTYPE(3)
											/PLOT=PROFILE(Bloque*Sesion)
											/EMMEANS=TABLES(Sesion) COMPARE ADJ(BONFERRONI)
		/WSFACTOR=Sesion 2 Polynomial Bloque 4 Polynomial									/EMMEANS=TABLES(Bloque) COMPARE ADJ(BONFERRONI)
		/METHOD=SSTYPE(3)									/EMMEANS=TABLES(Sesion*Bloque) COMPARE (Sesion)ADJ(BONFERRONI)
		/PLOT=PROFILE(Bloque*Sesion)									/EMMEANS=TABLES(Sesion*Bloque) COMPARE (Bloque)ADJ(BONFERRONI)
		/EMMEANS=TABLES(Sesion) COMPARE ADJ(BONFERRONI)									/PRINT=DESCRIPTIVE ETASQ OPOWER
		/EMMEANS=TABLES(Bloque) COMPARE ADJ(BONFERRONI)									/CRITERIA=ALPHA(.05)
		/EMMEANS=TABLES(Sesion*Bloque) COMPARE (Sesion)ADJ(BONFERRONI)									/WSDESIGN=Sesion Bloque Sesion*Bloque
		/EMMEANS=TABLES(Sesion*Bloque) COMPARE (Bloque)ADJ(BONFERRONI)
		/PRINT=DESCRIPTIVE ETASQ OPOWER
		/CRITERIA=ALPHA(.05)
		/WSDESIGN=Sesion Bloque Sesion*Bloque
